# Supplementary material
Source: PubMed Central journal article supplement (PMC6514613)
Supplement: supp_RA118.006233_141272_1_supp_293841_pnnp4j.pdf [file supp_RA118.006233_141272_1_supp_293841_pnnp4j.pdf]

| DinB Consensus/ Position | DinB Conservation (%) | DNA polymerase V Consensus/ Position | DNA polymerase V Conservation (%) | DNA polymerase II Consensus/ Position | DNA polymerase II Conservation (%) |
|--------------------------|-----------------------|--------------------------------------|-----------------------------------|---------------------------------------|------------------------------------|
| R38                      | 86                    | --                                   | -                                 | V42                                   | 81                                 |
| G39                      | 85                    | G35                                  | 83                                | A43                                   | 65                                 |
| V40                      | 87                    | C36                                  | 53                                | F44                                   | 92                                 |
| V41                      | 57                    | V37                                  | 69                                | I45                                   | 57                                 |
| S42                      | 50                    | I38                                  | 40                                | P46                                   | 73                                 |
| T43                      | 77                    | A39                                  | 84                                | A47                                   | 41                                 |
| A44                      | 60                    | R40                                  | 46                                | E48                                   | 26                                 |
| N45                      | 55                    | S41                                  | 60                                | Q49                                   | 55                                 |
| Y46                      | 94                    | P42                                  | 37                                | R50                                   | 40                                 |
| E47                      | 51                    | E43                                  | 55                                | E51                                   | 25                                 |
| A48                      | 93                    | A44                                  | 79                                | R52                                   | 31                                 |
| R49                      | 94                    | K45                                  | 89                                | A53                                   | 55                                 |
| K50                      | 51                    | -46                                  | 29                                | E54                                   | 36                                 |
| F/Y51                    |                       | L47                                  | 45                                | A55                                   | 23                                 |
| G52                      | 94                    | G48                                  | 51                                | G59                                   | 37                                 |
| V53                      | 74                    | -49                                  | 33                                | E60                                   | 62                                 |
| H54                      | 50                    | -50                                  | 32                                | R61                                   | 31                                 |
| S55                      | 89                    | M51                                  | 46                                | G62                                   | 28                                 |
| A56                      | 91                    | G52                                  | 50                                | V63                                   | 33                                 |
| M57                      | 92                    | -53                                  | 15                                | E64                                   | 48                                 |
| P58                      | 55                    | P54                                  | 56                                | L65                                   | 63                                 |
| T59                      | 27                    | -55                                  | 23                                | R66                                   | 53                                 |
| A60                      | 25                    | F56                                  | 53                                | P67                                   | 59                                 |
| E61                      | 21                    | -57                                  | 34                                | L68                                   | 83                                 |
| A62                      | 94                    | -58                                  | 20                                | A69                                   | 23                                 |
| L63                      | 31                    | -59                                  | 29                                | L70                                   | 83                                 |
| K64                      | 40                    | -60                                  | 20                                | K71                                   | 26                                 |
| L65                      | 58                    | -61                                  | 27                                | D72                                   | 77                                 |
| C66                      | 82                    | -62                                  | 20                                | F73                                   | 92                                 |
| P67                      | 90                    | -63                                  | 24                                | -74                                   | -                                  |

**Supplemental Table 1. Several residues of the DinB fingers domain are highly conserved only in DinB-like proteins.** This table contains conservation data plotted in Figure 2.

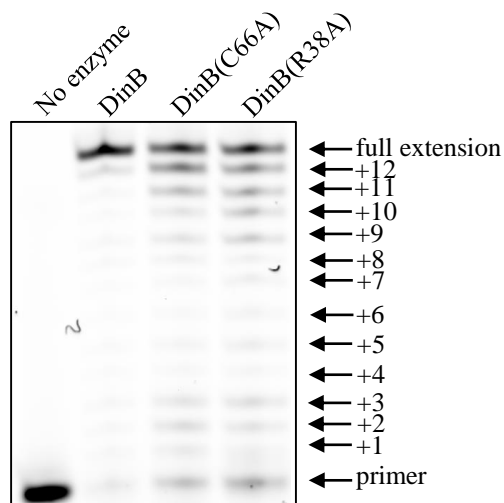

**Supplemental Figure 1. DNA synthesis activity of native DinB and DinB(C66A) are similar on undamaged DNA template.** DinB activity assay was performed as previously described (1) using a Cy3 labelled DNA primer that was annealed to an unlabeled DNA template. Reactions contained native DinB or DinB variant (1.25  $\mu$ M), primer:template (0.25 nM), dNTP mix (500  $\mu$ M), and 1X low salt buffer (20 mM Tris-HCl, pH 8.75, 10 mM KCl, 10 mM (NH<sub>4</sub>)<sub>2</sub>SO<sub>4</sub>, 2 mM MgSO<sub>4</sub>, 0.1% Triton X-100, 0.1 mg/mL bovine serum albumin). Reactions were performed at 37°C for 10 minutes. Products were separated on 10% denaturing polyacrylamide gel and imaged for Cy3 fluorescence on a Bio-Rad gel imager. Total DNA synthesis activity was calculated as the sum of the products of quantified bands (normalized to the total band quantification and the number of insertions required for the respective band (i.e. the sum of the quantification of the primer band multiplied by zero, plus the quantification of the +1 band multiplied by one, plus the quantification of the +2 band multiplied by two, etc). Experiments were performed in triplicate. The activity of the DinB(C66A) variant was not significantly different from the native enzyme (as determined by a two-tailed t-test of total activity).

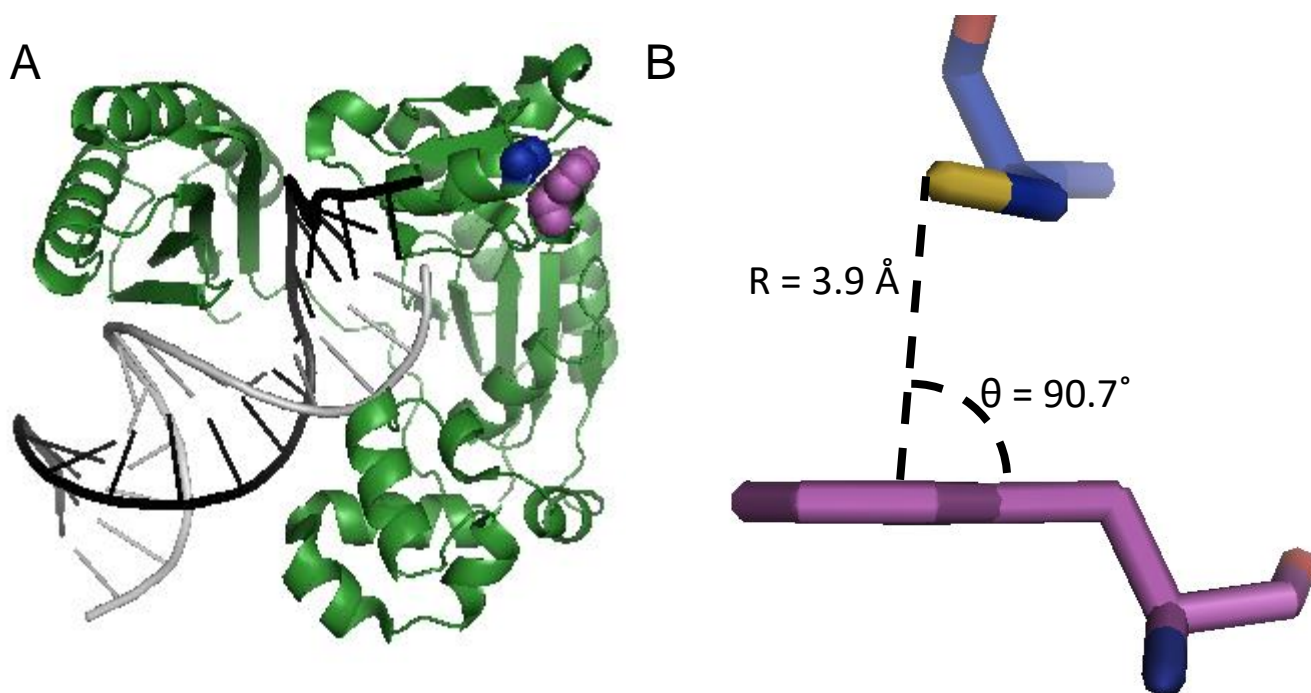

**Supplemental Figure 2. The change of cysteine 66 to alanine in the DinB(C66A) variant may eliminate bonding with highly conserved F51 in the fingers domain.** (A) Ribbon rendering of DinB crystal structure (PDB code 4IRC; (2)) suggests that an interaction between C66 (blue) and highly conserved F51 (magenta) is likely. (B) The distance between C66's sulfur atom and the center of F51's benzene ring ( $R$ ) and the angle between C66's sulfur residue (yellow) and the plane of F51's benzene ring ( $\theta$ ) fall within the range necessary (3) to form an aromatic-thiol  $\pi$ -type hydrogen bond. This interaction would be interrupted in the DinB(C66A) variant. Rendering was done using PyMol (4).

**A**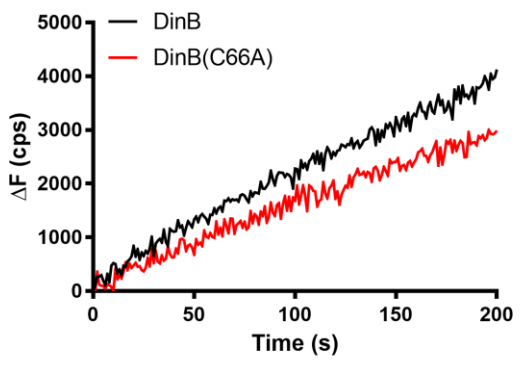**B**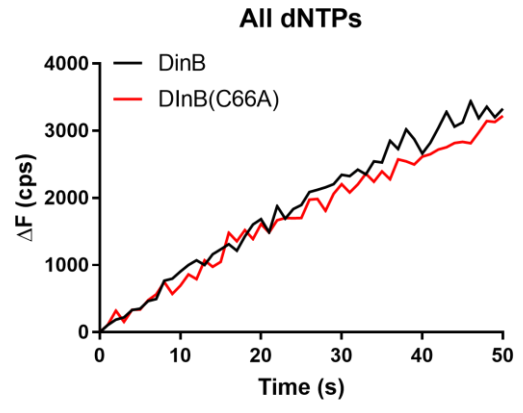**C**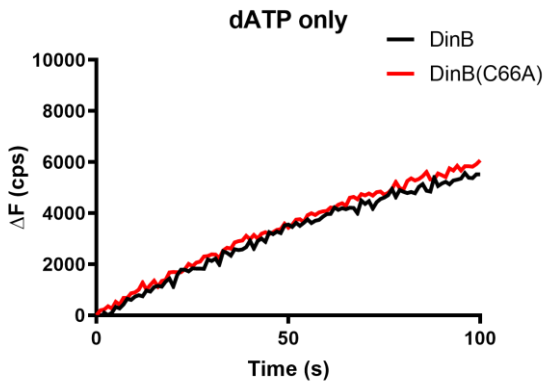

**Supplemental Figure 3. Enlargements of initial readings for RecA-dependent strand exchange experiments in Figures 5B (A), 6B (B), and 6C (C).**

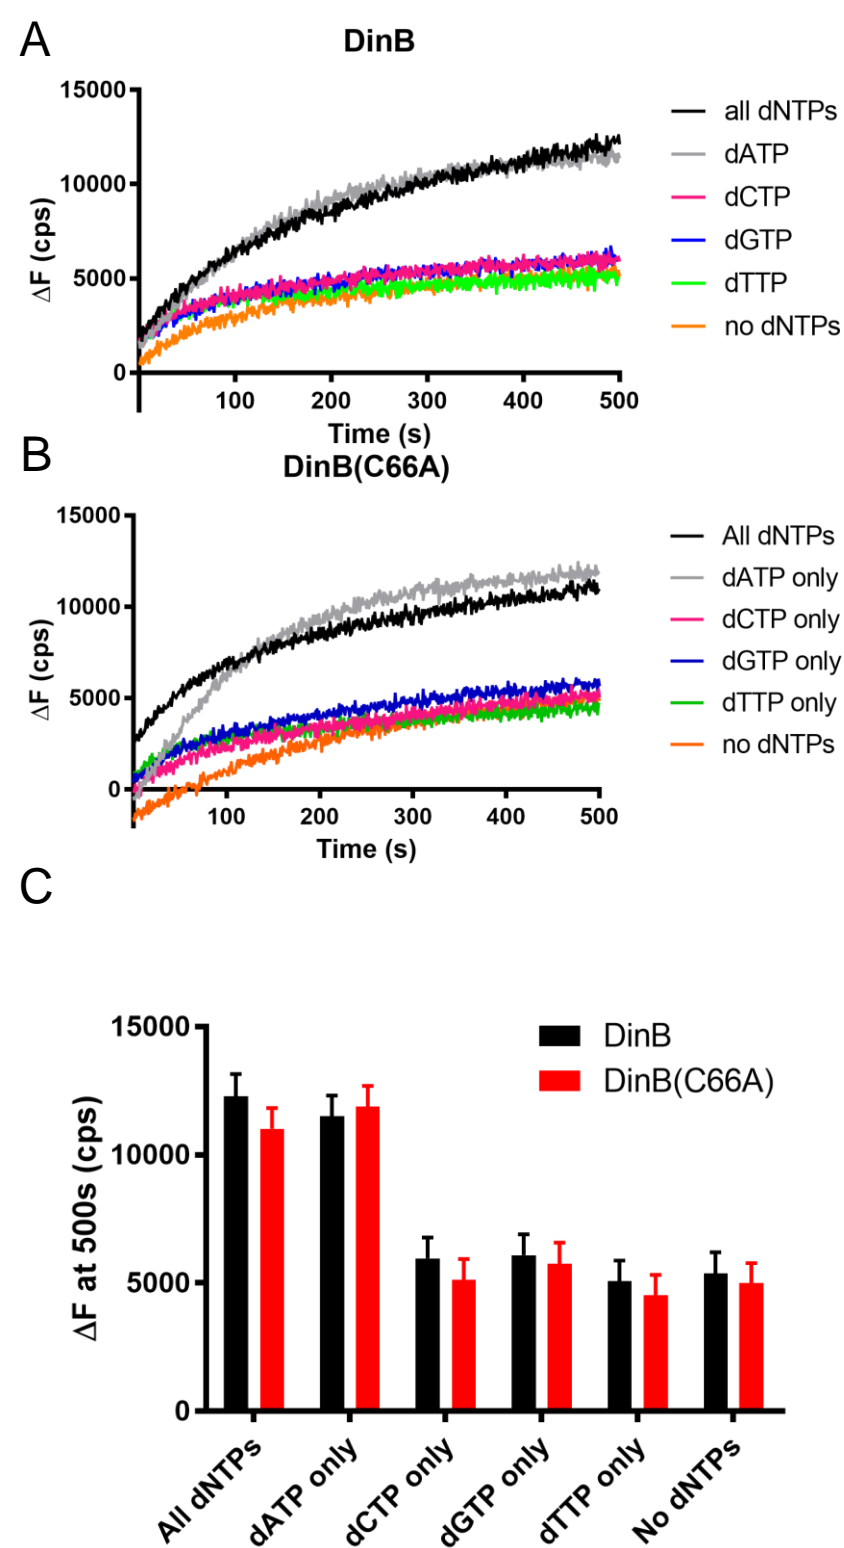

**Supplemental Figure 4. DinB and DinB(C66A) show comparable fidelity during strand exchange.** Experiments were performed as in Figure 6B using all or individual nucleotides and DinB (A) or DinB(C66A) (B). Experiments were performed in triplicate. Representative data is shown. (C) Fluorescence at 500s is shown for all reactions to compare results of DinB and DinB(C66A). Experiments were performed in triplicate. Mean  $\pm$  standard deviation is shown.  $\Delta F$ , change in fluorescence measured in counts per second (cps).

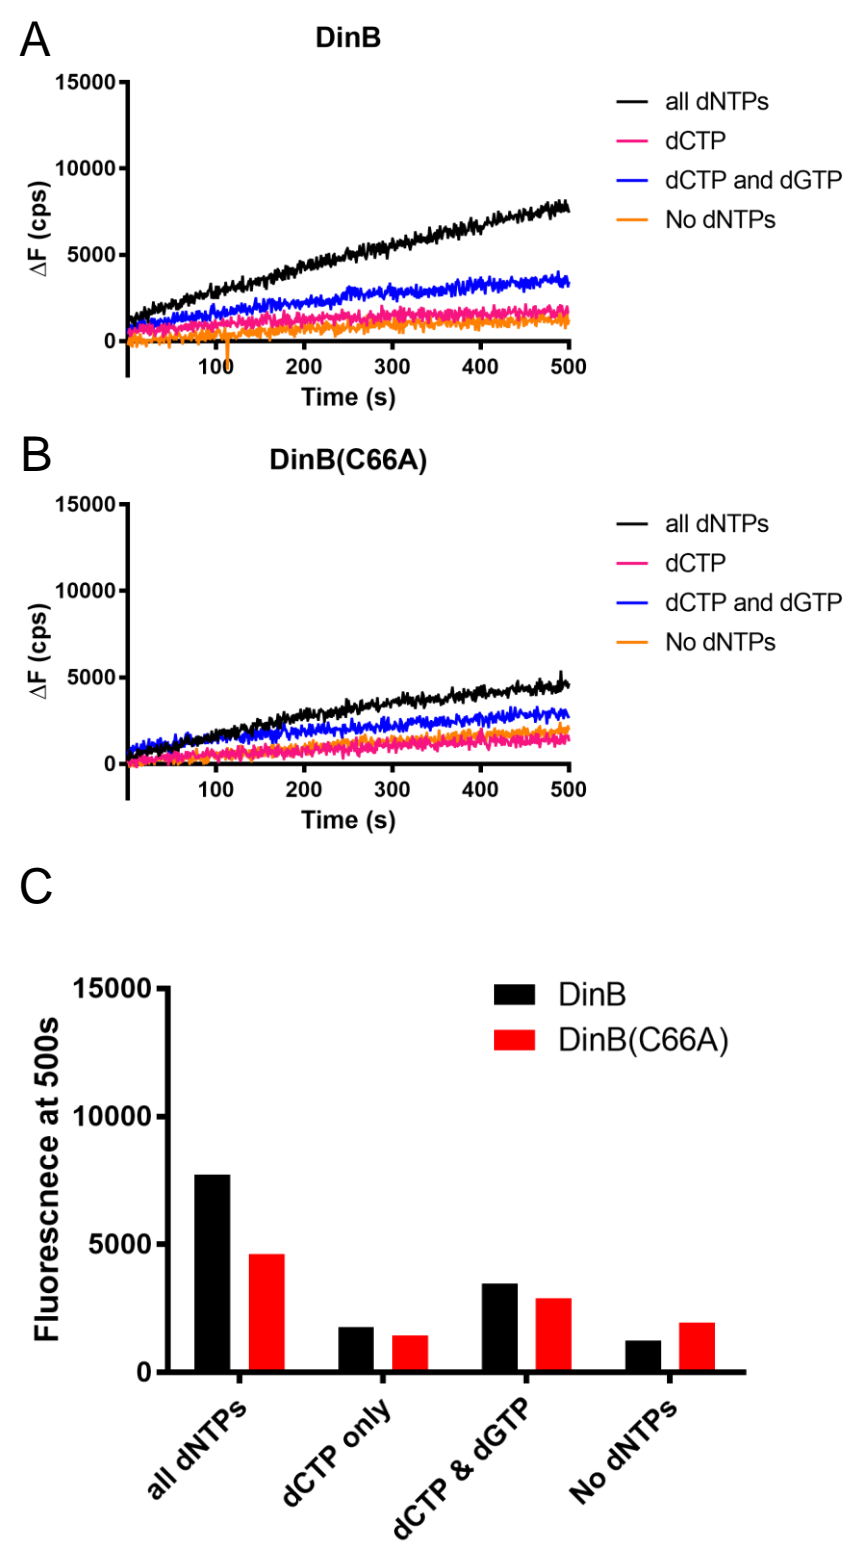

**Supplemental Figure 5. DinB and DinB(C66A) show comparable fidelity during strand exchange.** Experiments were performed as in Figure 5B using all or individual nucleotides and DinB (A) or DinB(C66A) (B). (C) Fluorescence at 500s is shown for all reactions to compare results of DinB and DinB(C66A). Experiments were performed in triplicate. Representative data is shown.  $\Delta F$ , change in fluorescence measured in counts per second (cps).

## References

1. Cafarelli, T. M., Rands, T. J., and Godoy, V. G. (2014) The DinB\*RecA complex of *Escherichia coli* mediates an efficient and high-fidelity response to ubiquitous alkylation lesions. *Environ. Mol. Mutagen.* **55**, 92–102
2. Sharma, A., Kottur, J., Narayanan, N., and Nair, D. T. (2013) A strategically located serine residue is critical for the mutator activity of DNA polymerase IV from *Escherichia coli*. *Nucleic Acids Res.* **41**, 5104–5114
3. Duan, G., Smith, V. H., and Weaver, D. F. (2001) Characterization of aromatic-thiol  $\pi$ -type hydrogen bonding and phenylalanine-cysteine side chain interactions through ab initio calculations and protein database analyses. *Mol. Phys.* **99**, 1689-1699
4. Mackerell, A. D., Feig, M., and Brooks, C. L. (2004) Extending the treatment of backbone energetics in protein force fields: Limitations of gas-phase quantum mechanics in reproducing protein conformational distributions in molecular dynamics simulation. *J. Comput. Chem.* **25**, 1400–1415
